# Supplementary material for: Clarifying the controversial catalytic active sites of Co3O4 for the oxygen evolution reaction
Source: Royal Society of Chemistry journal article supplement (doi:10.1039/c9ta08379k), 2019-01-01
Supplement: c9ta08379k1.pdf [file c9ta08379k1.pdf]

## Supporting Information

### Clarifying the controversial catalytic active sites of $\text{Co}_3\text{O}_4$ for oxygen evolution reaction

Yong Xu,<sup>a</sup> Fengchu Zhang,<sup>b</sup> Tian Sheng,<sup>c</sup> Tao Ye,<sup>b</sup> Ding Yi,<sup>b</sup> Yijun Yang,<sup>b</sup> Shoujie Liu,<sup>c</sup> Xi

Wang<sup>b,\*</sup> and Jiannian Yao<sup>a, c, d,\*</sup>

<sup>a</sup> School of Chemical Engineering and Technology, Tianjin University; Institute of Molecular Plus, Tianjin University, Tianjin, 300072, P. R. China

E-mail: [jnyao@iccas.ac.cn](mailto:jnyao@iccas.ac.cn)

<sup>b</sup> Key Laboratory of Luminescence and Optical Information, Ministry of Education, Department of Physics, School of Science, Beijing Jiaotong University, Beijing, 100044, P. R. China

E-mail: [xiwang@bjtu.edu.cn](mailto:xiwang@bjtu.edu.cn)

<sup>c</sup> Chemistry and Chemical Engineering Guangdong Laboratory Shantou 515031, P. R. China

<sup>d</sup> Key Laboratory of Photochemistry, Institute of Chemistry, Chinese Academy of Sciences, Beijing, 100190, China

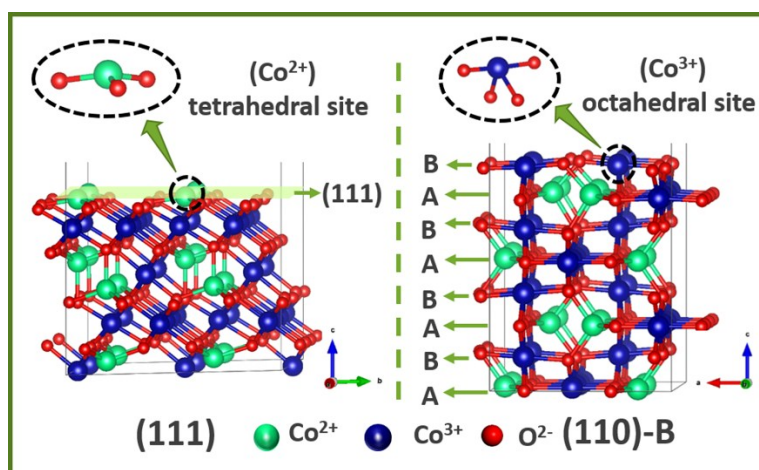

**Fig. S1** The side-view of  $\text{Co}_3\text{O}_4$  structure and the surface atomic configurations in the (111) plane (right) and the (110)-B plane (left).

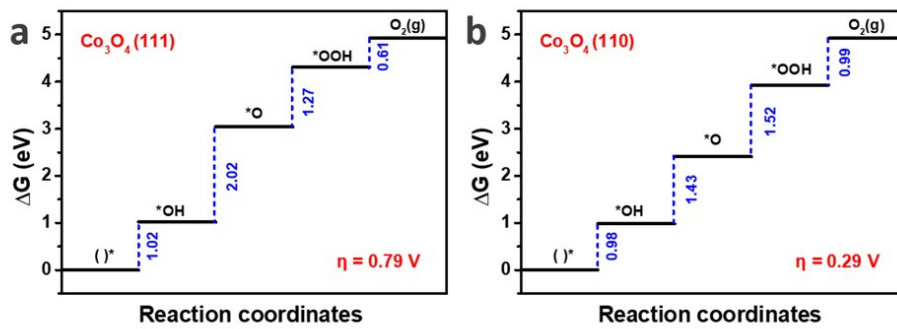

**Fig. S2** The calculated OER free energy diagram over the (111) plane (a) and (110)-B plane (b) of  $\text{Co}_3\text{O}_4$ . Free energy diagram for  $\text{Co}_3\text{O}_4$  (111) and  $\text{Co}_3\text{O}_4$  (110)-B for OER at zero potential ( $U = 0$ ).

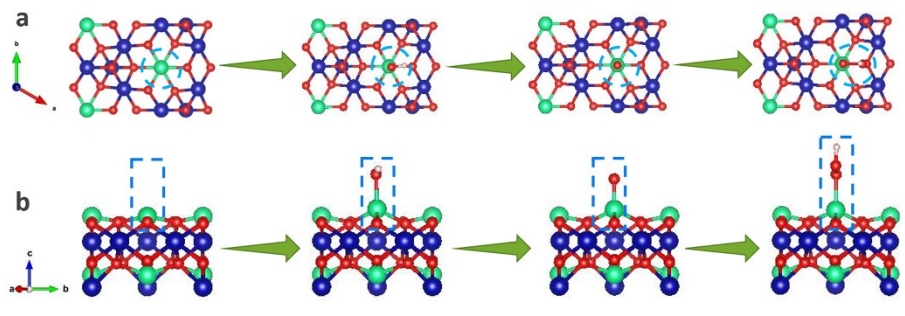

**Fig. S3** Adsorption configurations over the (111) plane of  $\text{Co}_3\text{O}_4$ , (a) top-view and (b) side-view.

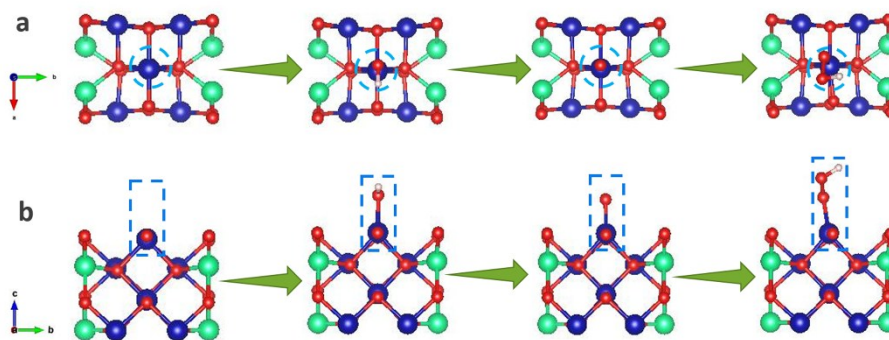

**Fig. S4** Adsorption configurations over the (110)-B plane of  $\text{Co}_3\text{O}_4$ , (a) top-view and (b) side-view.

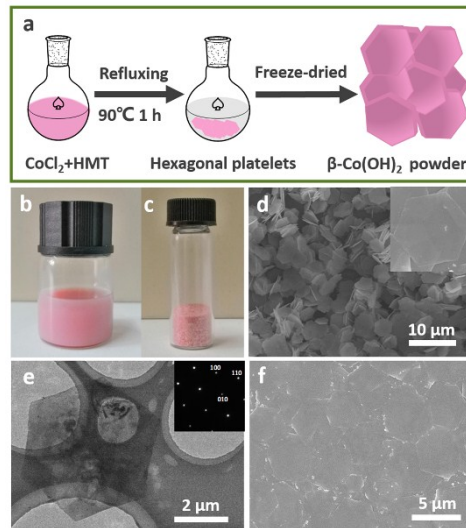

**Fig. S5** (a) Schematic illustration of the synthesis for hexagonal platelets of  $\beta\text{-Co(OH)}_2\text{-5.0}$ . (b) The suspension of  $\beta\text{-Co(OH)}_2\text{-5.0}$  in ethanol. (c) The powder of the  $\beta\text{-Co(OH)}_2\text{-5.0}$  hexagonal platelets made by freeze-dried. (d) SEM images of  $\beta\text{-Co(OH)}_2\text{-5.0}$  hexagonal platelets at low and high magnification (Inset). (e) TEM image of  $\beta\text{-Co(OH)}_2\text{-5.0}$  hexagonal platelet and typical electron diffraction pattern (Inset). (f) SEM image of  $\beta\text{-Co(OH)}_2\text{-5.0}$  film fabricated by the hexane/water interfacial self-assembly strategy.

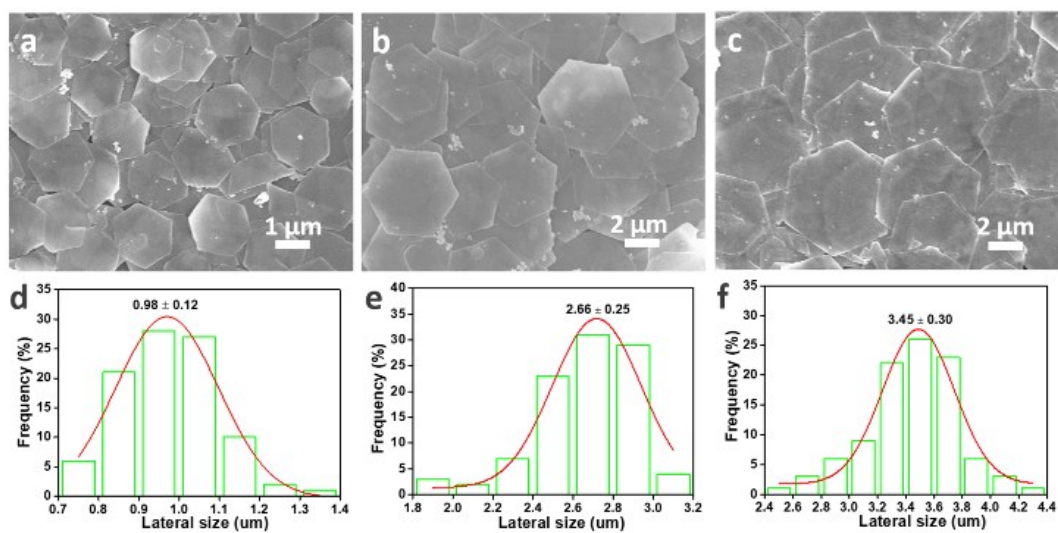

**Fig. S6** (a-c) The SEM images of  $\beta\text{-Co(OH)}_2\text{-2.5}$ ,  $\beta\text{-Co(OH)}_2\text{-5.0}$  and  $\beta\text{-Co(OH)}_2\text{-7.5}$ , respectively. (d-f) The corresponding lateral size distributions of  $\beta\text{-Co(OH)}_2\text{-2.5}$ ,  $\beta\text{-Co(OH)}_2\text{-5.0}$  and  $\beta\text{-Co(OH)}_2\text{-7.5}$ .

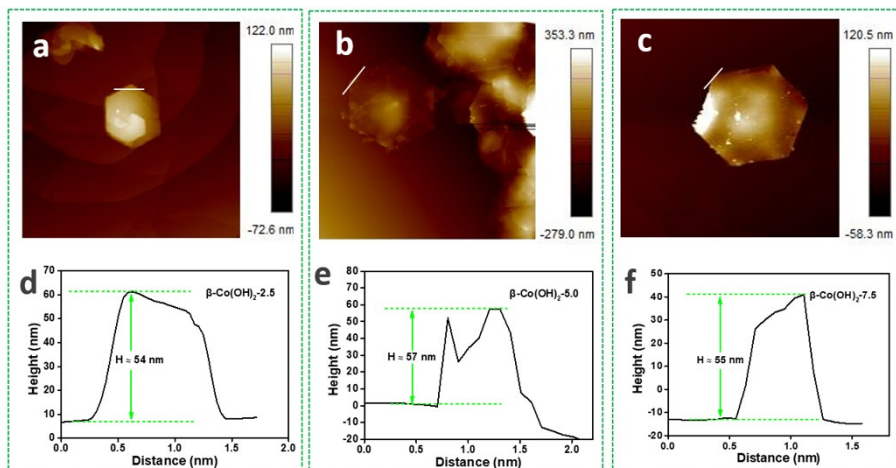

**Fig. S7** AFM images of (a)  $\beta\text{-Co(OH)}_2\text{-2.5}$ , (b)  $\beta\text{-Co(OH)}_2\text{-5.0}$  and (c)  $\beta\text{-Co(OH)}_2\text{-7.5}$ . The corresponding thickness measurement data of (d)  $\beta\text{-Co(OH)}_2\text{-2.5}$ , (e)  $\beta\text{-Co(OH)}_2\text{-5.0}$  and (f)  $\beta\text{-Co(OH)}_2\text{-7.5}$ .



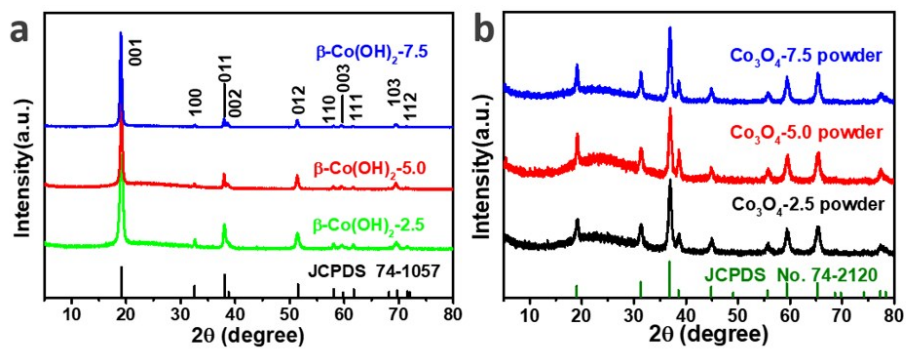

**Fig. S8** (a) XRD pattern of synthesized pink powder of  $\beta\text{-Co(OH)}_2\text{-2.5}$ ,  $\beta\text{-Co(OH)}_2\text{-5.0}$  and  $\beta\text{-Co(OH)}_2\text{-7.5}$ . (b) XRD patterns of  $\text{Co}_3\text{O}_4\text{-2.5}$ ,  $\text{Co}_3\text{O}_4\text{-5.0}$  and  $\text{Co}_3\text{O}_4\text{-7.5}$ .

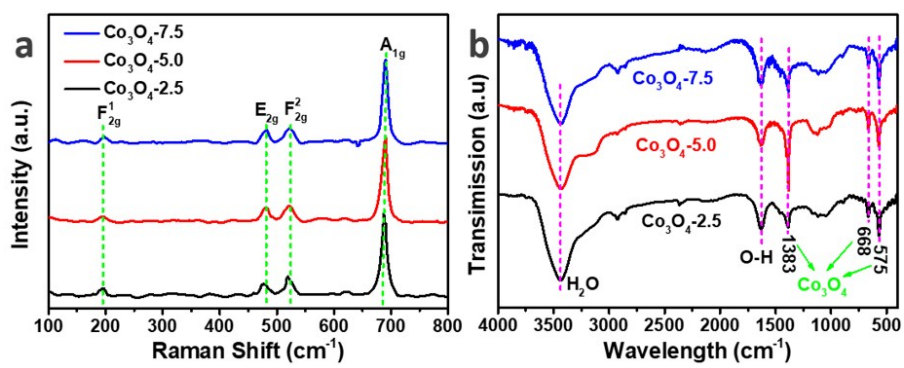

**Fig. S9** (a) Raman spectra of synthesized  $\text{Co}_3\text{O}_4$ -2.5,  $\text{Co}_3\text{O}_4$ -5.0, and  $\text{Co}_3\text{O}_4$ -7.5 powder. (b) FTIR spectra of synthesized  $\text{Co}_3\text{O}_4$ -2.5,  $\text{Co}_3\text{O}_4$ -5.0, and  $\text{Co}_3\text{O}_4$ -7.5 powder.

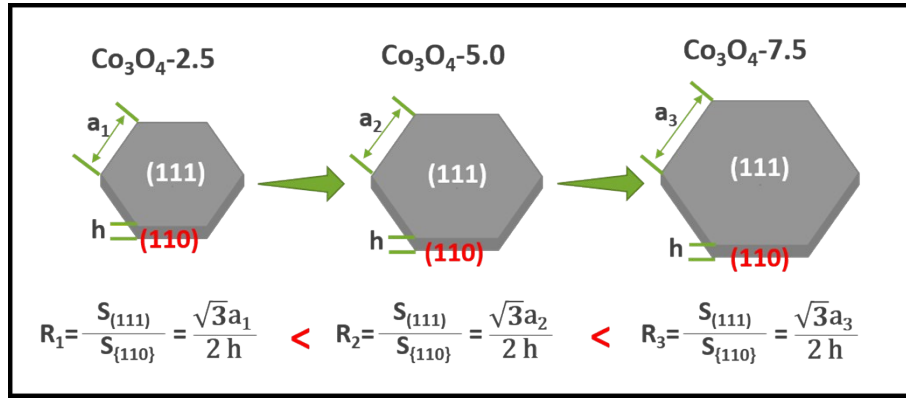

**Fig. S10** Structure models of  $\text{Co}_3\text{O}_4\text{-2.5}$ ,  $\text{Co}_3\text{O}_4\text{-5.0}$  and  $\text{Co}_3\text{O}_4\text{-7.5}$  hexagonal platelets and the corresponding ratios ( $R_1$ - $R_3$ ) of the (111) planes and {110} planes.

( $S_{(111)}$ : the area of both top and bottom regular hexagons ((111) planes);  $S_{\{110\}}$ : the area of six side rectangles ({110} planes).  $a_1$ - $a_3$ : the lateral sizes of  $\text{Co}_3\text{O}_4\text{-2.5}$ ,  $\text{Co}_3\text{O}_4\text{-5.0}$  and  $\text{Co}_3\text{O}_4\text{-7.5}$ , respectively.  $h$ : the thickness of the  $\text{Co}_3\text{O}_4\text{-2.5}$ ,  $\text{Co}_3\text{O}_4\text{-5.0}$  and  $\text{Co}_3\text{O}_4\text{-7.5}$ .  $R_1 : R_2 : R_3 = a_1 : a_2 : a_3 = 1.0 : 2.7 : 3.5$ .)

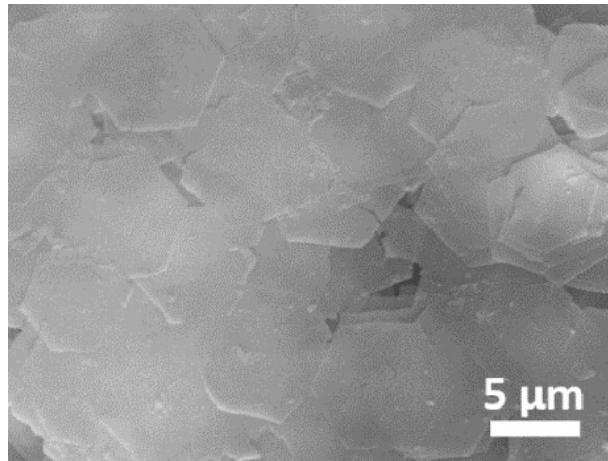

**Fig. S11** The SEM images of  $\text{Co}_3\text{O}_4$ -5.0 hexagonal platelets on the surface of conductive silicon substrate.

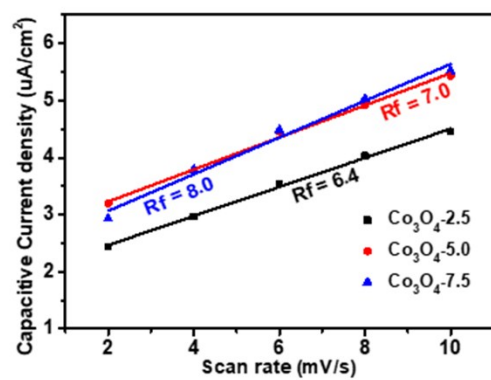

**Fig. S12** Dependence relation of the capacitive current vs. scan rate for Co<sub>3</sub>O<sub>4</sub>-2.5, Co<sub>3</sub>O<sub>4</sub>-5.0 and Co<sub>3</sub>O<sub>4</sub>-7.5.

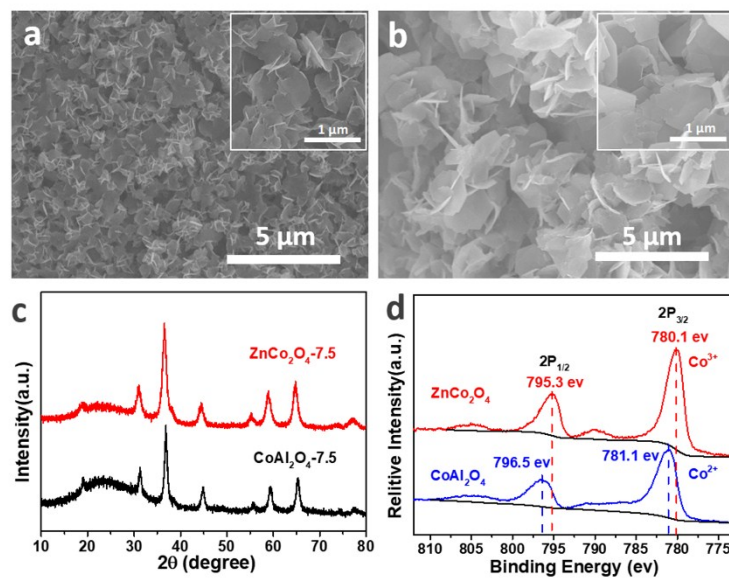

**Fig. S13** (a, b) SEM images of CoAl<sub>2</sub>O<sub>4</sub>-7.5 and ZnCo<sub>2</sub>O<sub>4</sub>-7.5 at low and high (inset) magnification, respectively. (c) XRD pattern of CoAl<sub>2</sub>O<sub>4</sub>-7.5 and ZnCo<sub>2</sub>O<sub>4</sub>-7.5. (d) XPS spectra of the Co 2p in CoAl<sub>2</sub>O<sub>4</sub>-7.5 and ZnCo<sub>2</sub>O<sub>4</sub>-7.5.

(The CoAl<sub>2</sub>O<sub>4</sub>-7.5 and ZnCo<sub>2</sub>O<sub>4</sub>-7.5 were synthesised with the same method as Co<sub>3</sub>O<sub>4</sub>-7.5. In synthesis procedure of the precursor, the amounts of CoCl<sub>2</sub>·6H<sub>2</sub>O with AlCl<sub>3</sub> (Co/Al = 1/2) and CoCl<sub>2</sub>·6H<sub>2</sub>O with ZnCl<sub>2</sub> (Co/Zn = 2/1) were dissolved to give the total concentrations of 7.5 mM, respectively. The samples were denoted as CoAl<sub>2</sub>O<sub>4</sub>-7.5 and ZnCo<sub>2</sub>O<sub>4</sub>-7.5, respectively.)

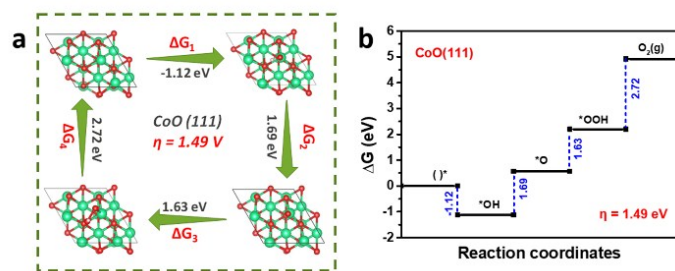

**Fig. S14** (a) Adsorption configurations over the (111) plane of CoO. (b) The calculated OER free energy diagram over the (111) plane of CoO.
